# Supplementary material for: Hydrogen-bond-induced cathode engineering interface achieving high-efficiency organic solar cells
Source: Royal Society of Chemistry journal article supplement (doi:10.1039/d1tc05129f), 2022-01-01
Supplement: d1tc05129f1.pdf [file d1tc05129f1.pdf]

| Interlayer | $V_{oc}$ [V] | $J_{sc}$ [mA/cm <sup>2</sup> ] | FF[%] | PCE[%] |
|------------|--------------|--------------------------------|-------|--------|
| 0.25mg/mL  | 0.82         | 27.59                          | 71.9% | 16.26  |
| 0.5mg/mL   | 0.82         | 28.12                          | 72.2% | 16.65  |
| 1mg/mL     | 0.81         | 27.73                          | 71.6% | 16.16  |
| 2mg/mL     | 0.81         | 26.33                          | 70.8% | 15.27  |

Table 1. Summary of performances for the inverted-type PM6:Y6 solar cells according to the thickness of the E-PI interlayers.

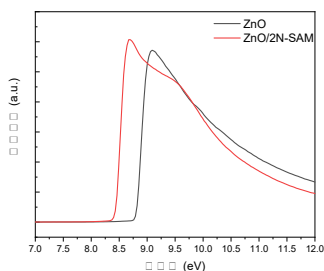

Figure 1. UPS spectra of the ZnO and 2N-SAM-treated ZnO

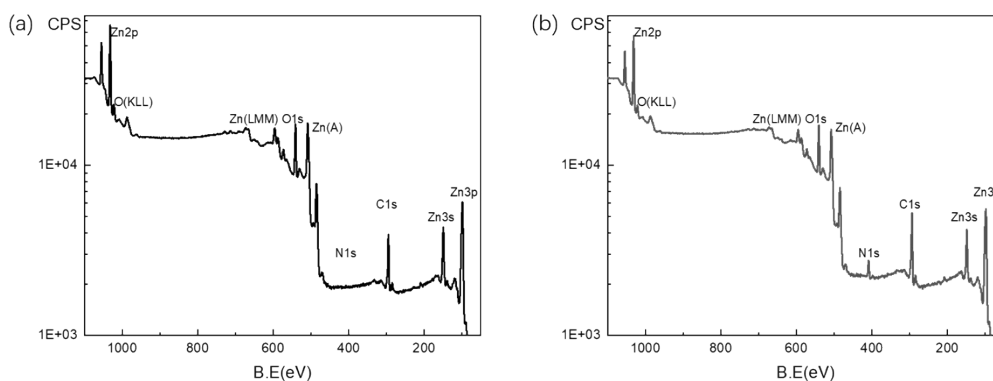

Figure 2. The XPS image of (a) ZnO and (b) ZnO/2N-SAM

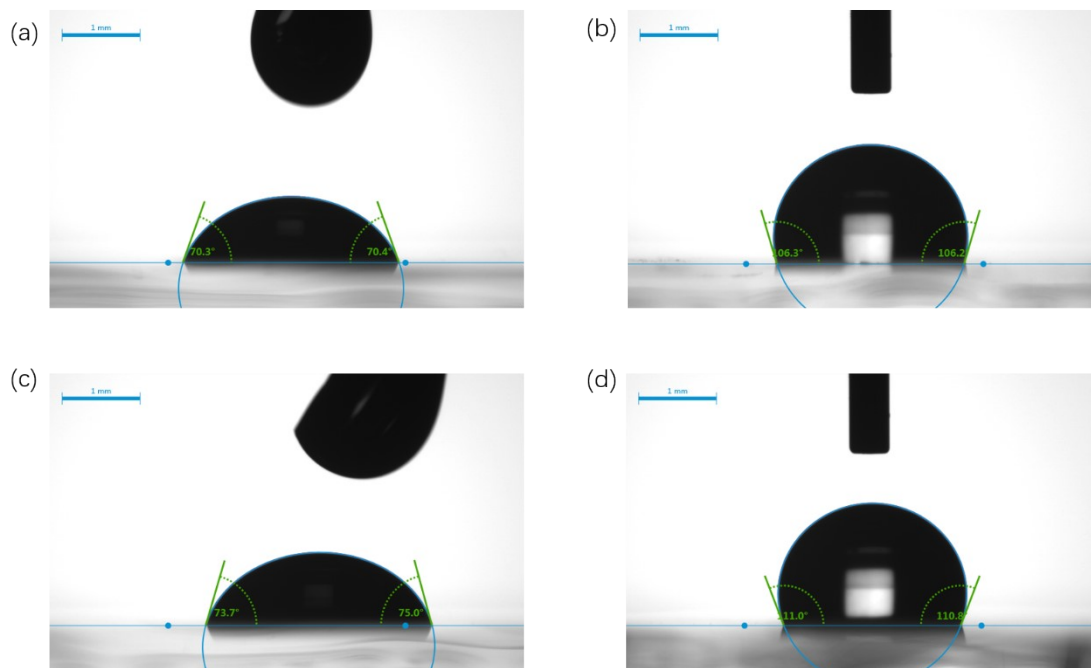

Figure 3. The contact-angle of (a,b)ZnO and (c,d)ZnO/2N-SAM

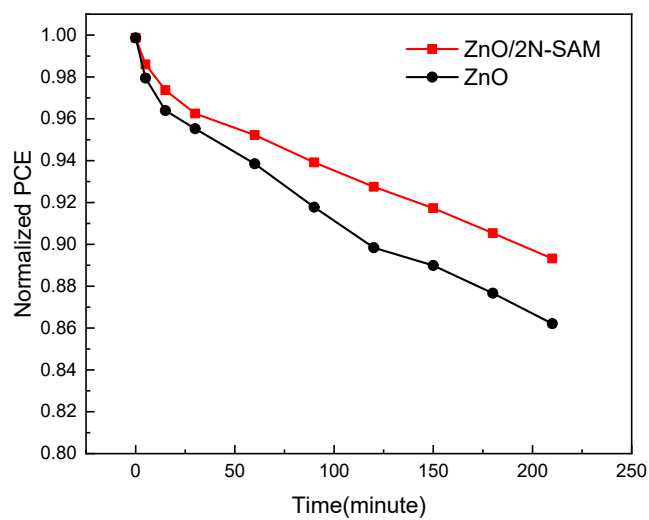

Figure 4. The light stability of ZnO and ZnO/2N-SAM devices
